# Supplementary material for: New Schiff base salts as sources of blue and green light in the solid state: the role of the anion and protonation
Source: Royal Society of Chemistry journal article supplement (doi:10.1039/d3ce00758h), 2023-01-01
Supplement: d3ce00758h1.pdf [file d3ce00758h1.pdf]

Supplementary Information

**New Schiff base salts as sources of blue and green light in the solid state: the role of anion and protonation**

Paulina Sobczak <sup>a,b</sup>, Tomasz Sierański <sup>a</sup>, Marcin Świątkowski <sup>a</sup> and Agata Trzęsowska-Kruszyńska <sup>a</sup>

<sup>a</sup> *Institute of General and Ecological Chemistry, Lodz University of Technology, Zeromskiego 116, 90924, Lodz, Poland*

<sup>b</sup> *Łukasiewicz – Lodz Institute of Technology, M. Skłodowskiej-Curie 19/27, 90570 Lodz, Poland*

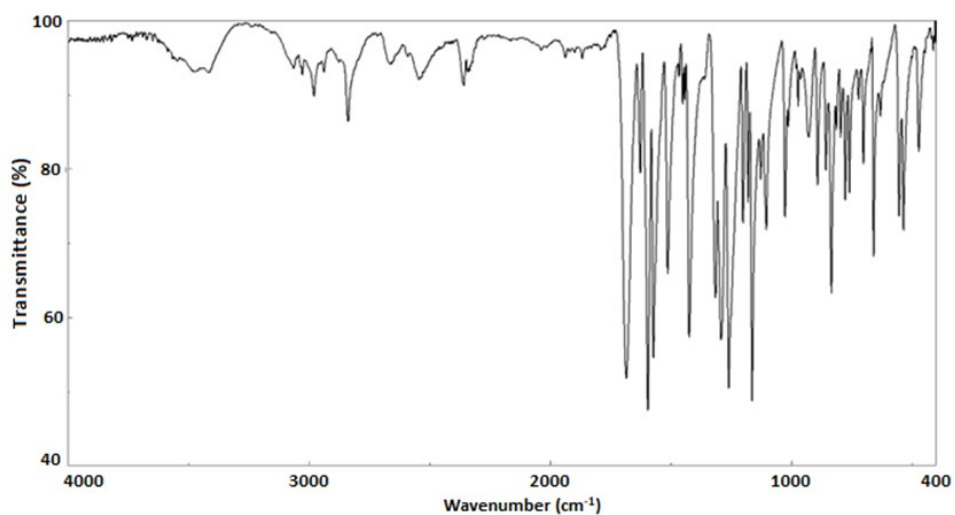

Figure S1. IR spectrum of *N*-(4'-methoxybenzylidene)-4-aminobenzoic acid (1a).

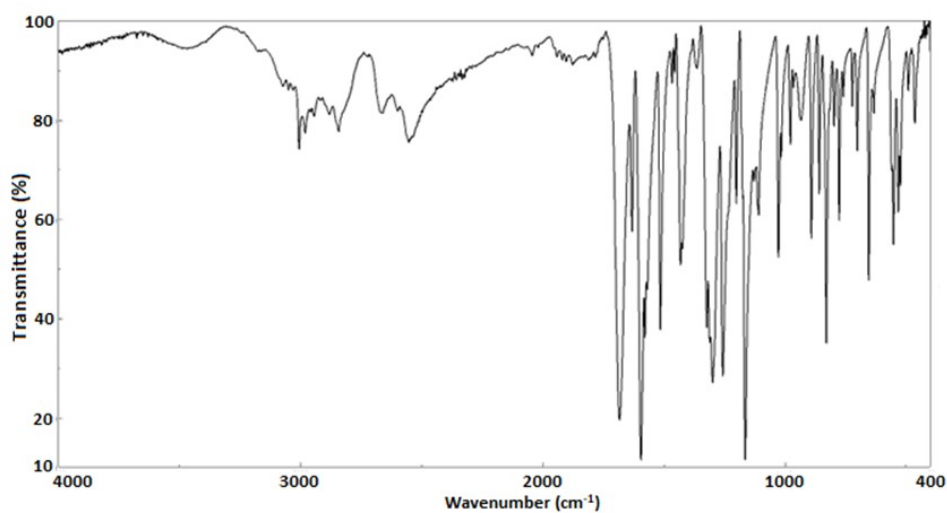

Figure S2. IR spectrum of *N*-(4'-methoxybenzylidene)-4-aminobenzoic acid (1b).

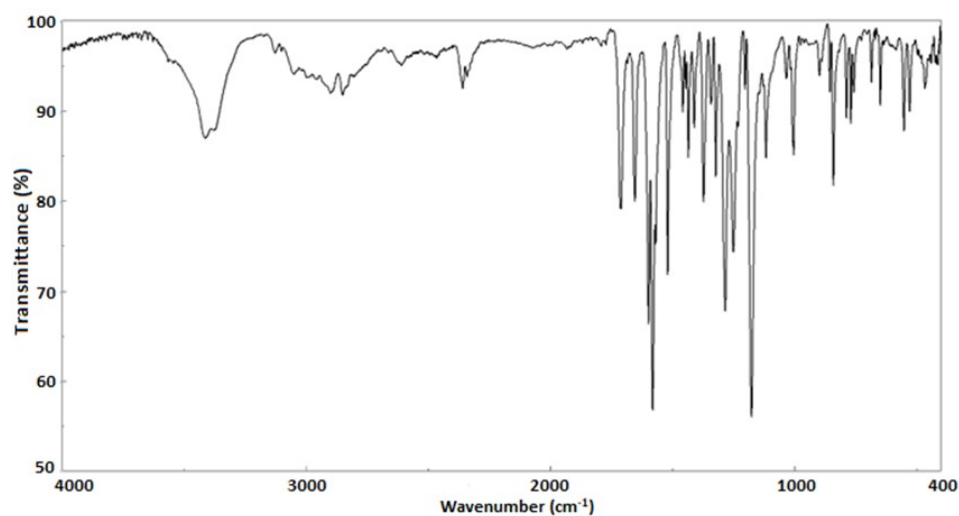

Figure S3. IR spectrum of 4-carboxy-*N*-(4'-methoxybenzylidene)anilium chloride monohydrate (2).

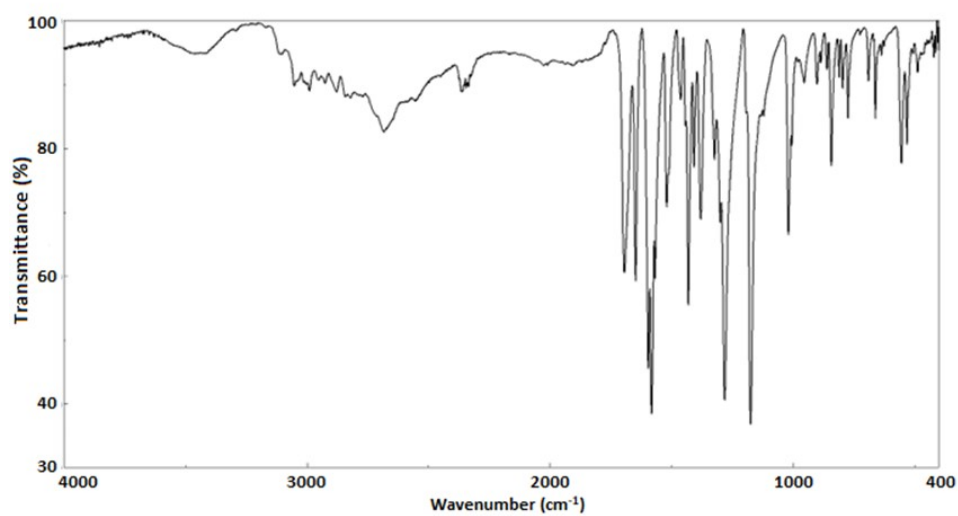

Figure S4. IR spectrum of 4-carboxy-*N*-(4'-methoxybenzylidene)anilium bromide monohydrate (3).

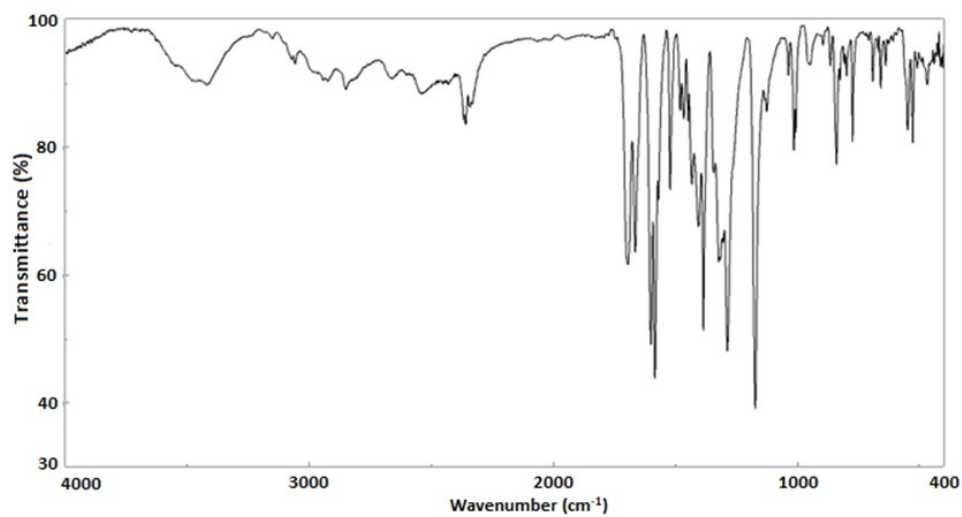

Figure S5. IR spectrum of 4-carboxy-*N*-(4'-methoxybenzylidene)anilium nitrate (4).

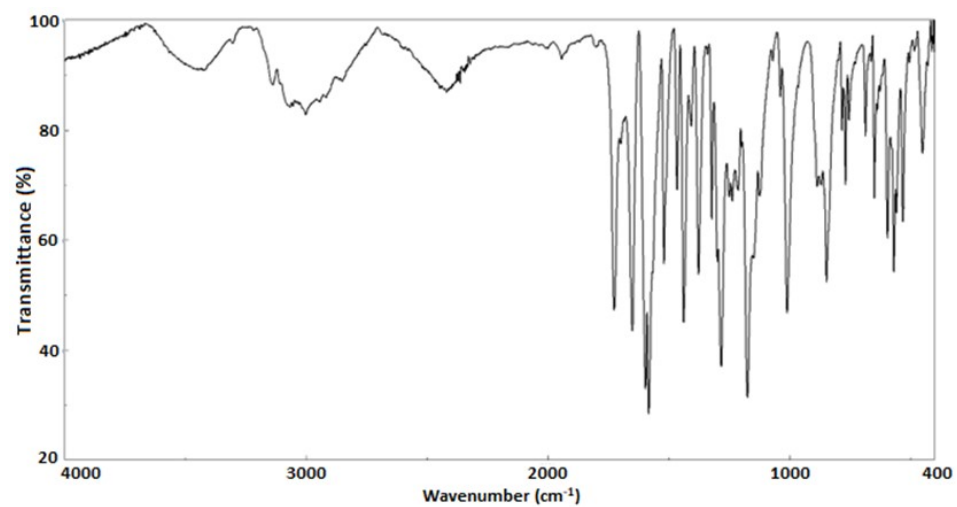

Figure S6. IR spectrum of 4-carboxy-*N*-(4'-methoxybenzylidene)anilium hydrogen sulfate (5).

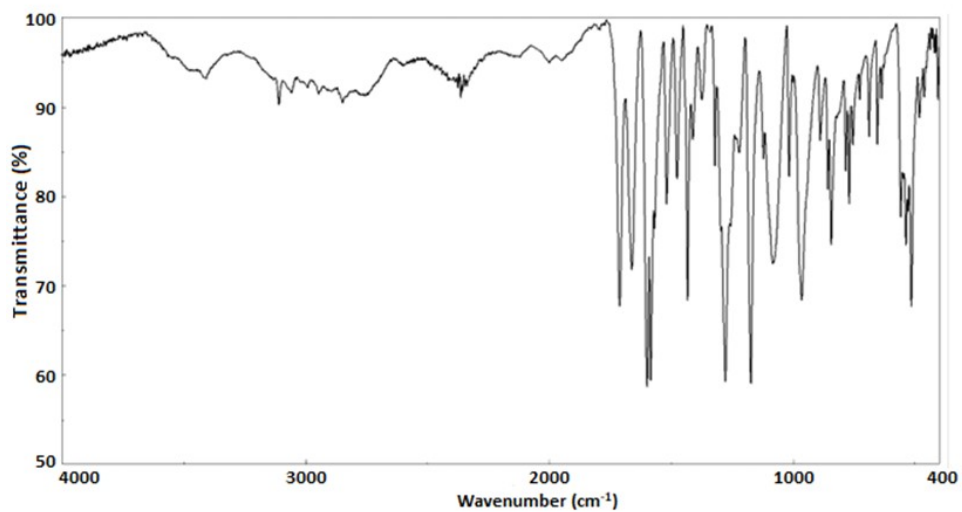

Figure S7. IR spectrum of 4-carboxy-*N*-(4'-methoxybenzylidene)anilium dihydrogen phosphate (6).

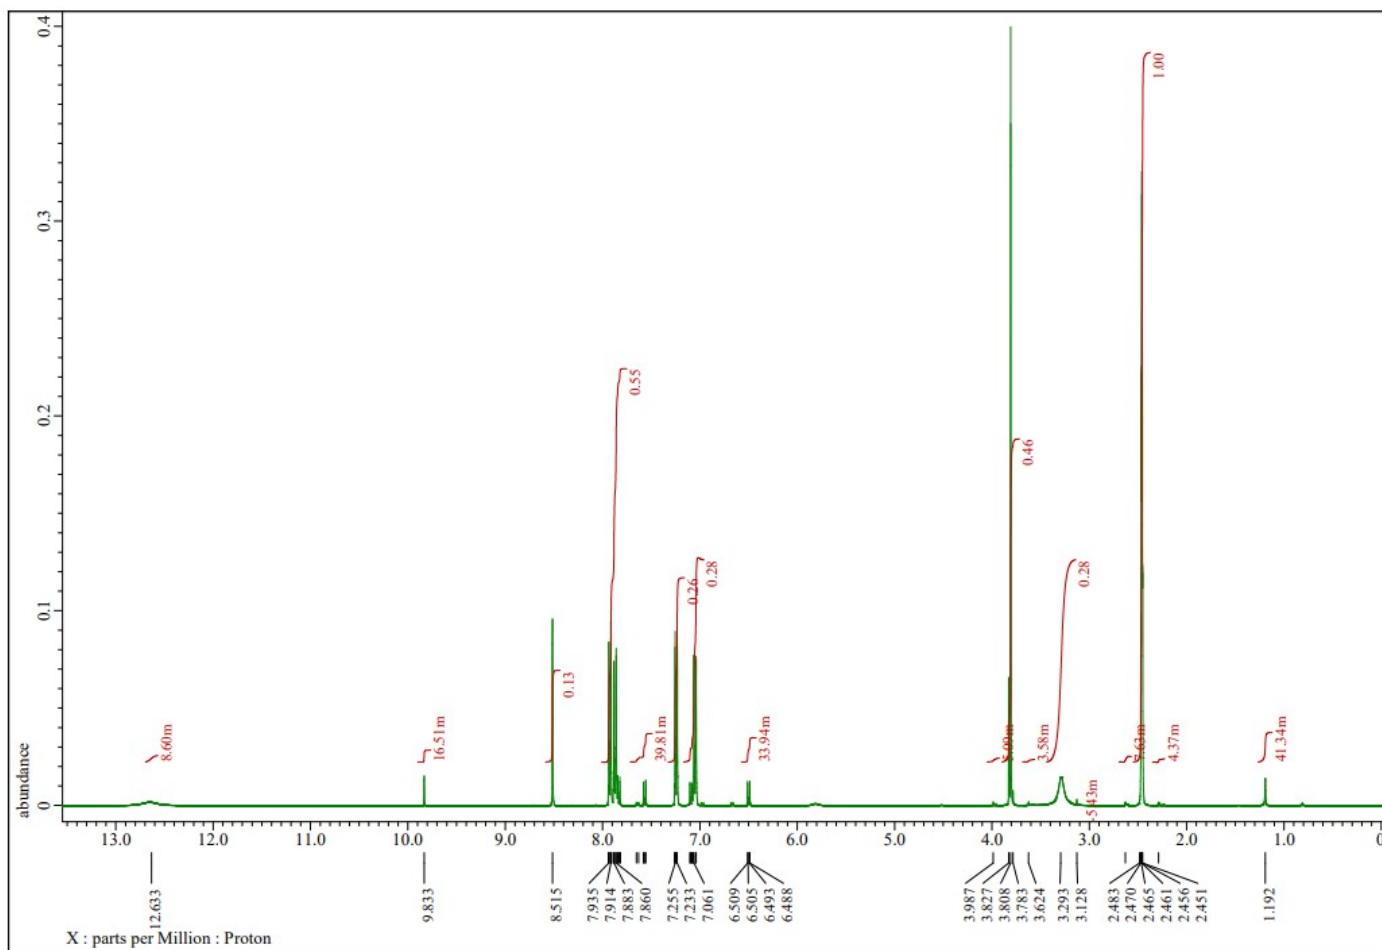

Figure S8. NMR spectrum of *N*-(4'-methoxybenzylidene)-4-aminobenzoic acid (1a).

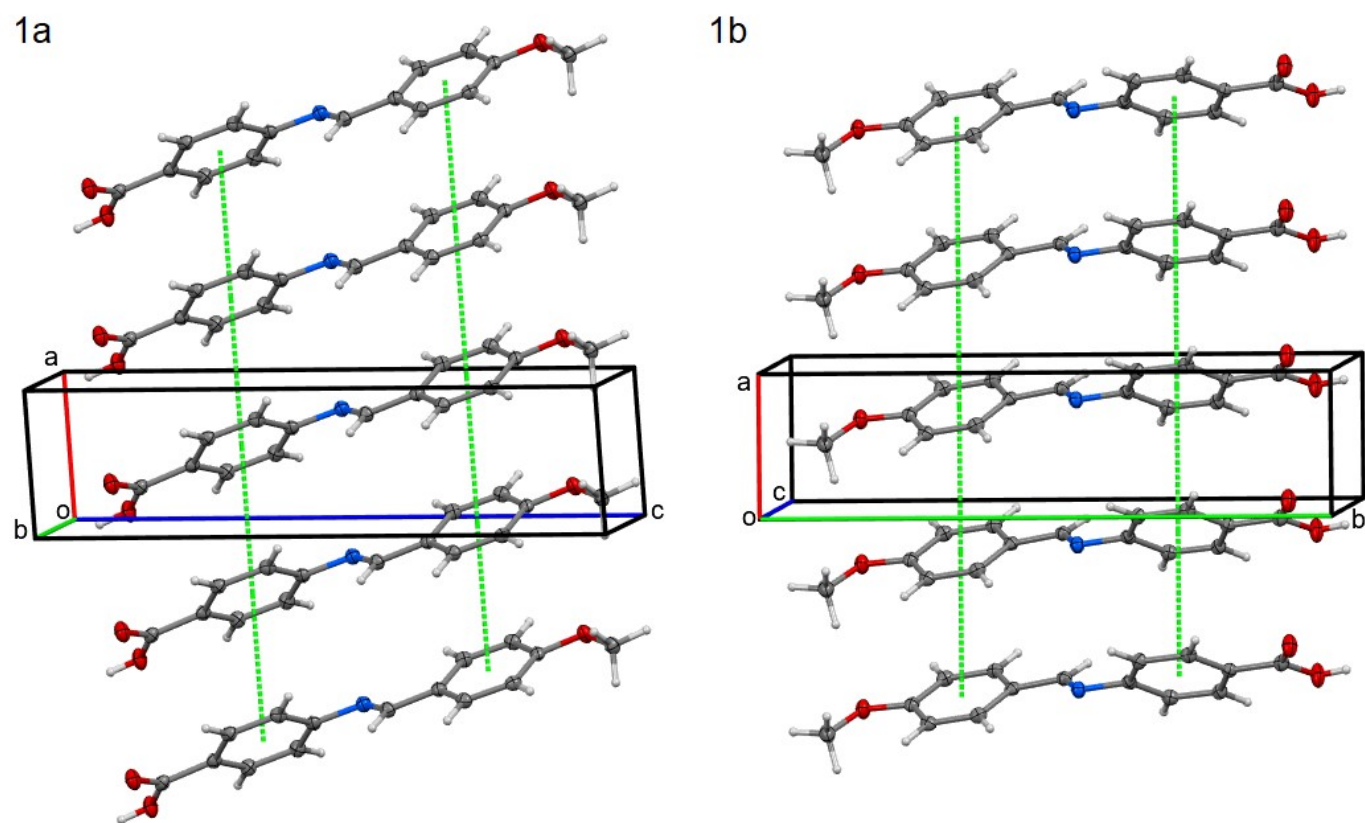

Figure S9. The  $\pi \cdots \pi$  interactions in **1a** and **1b**.

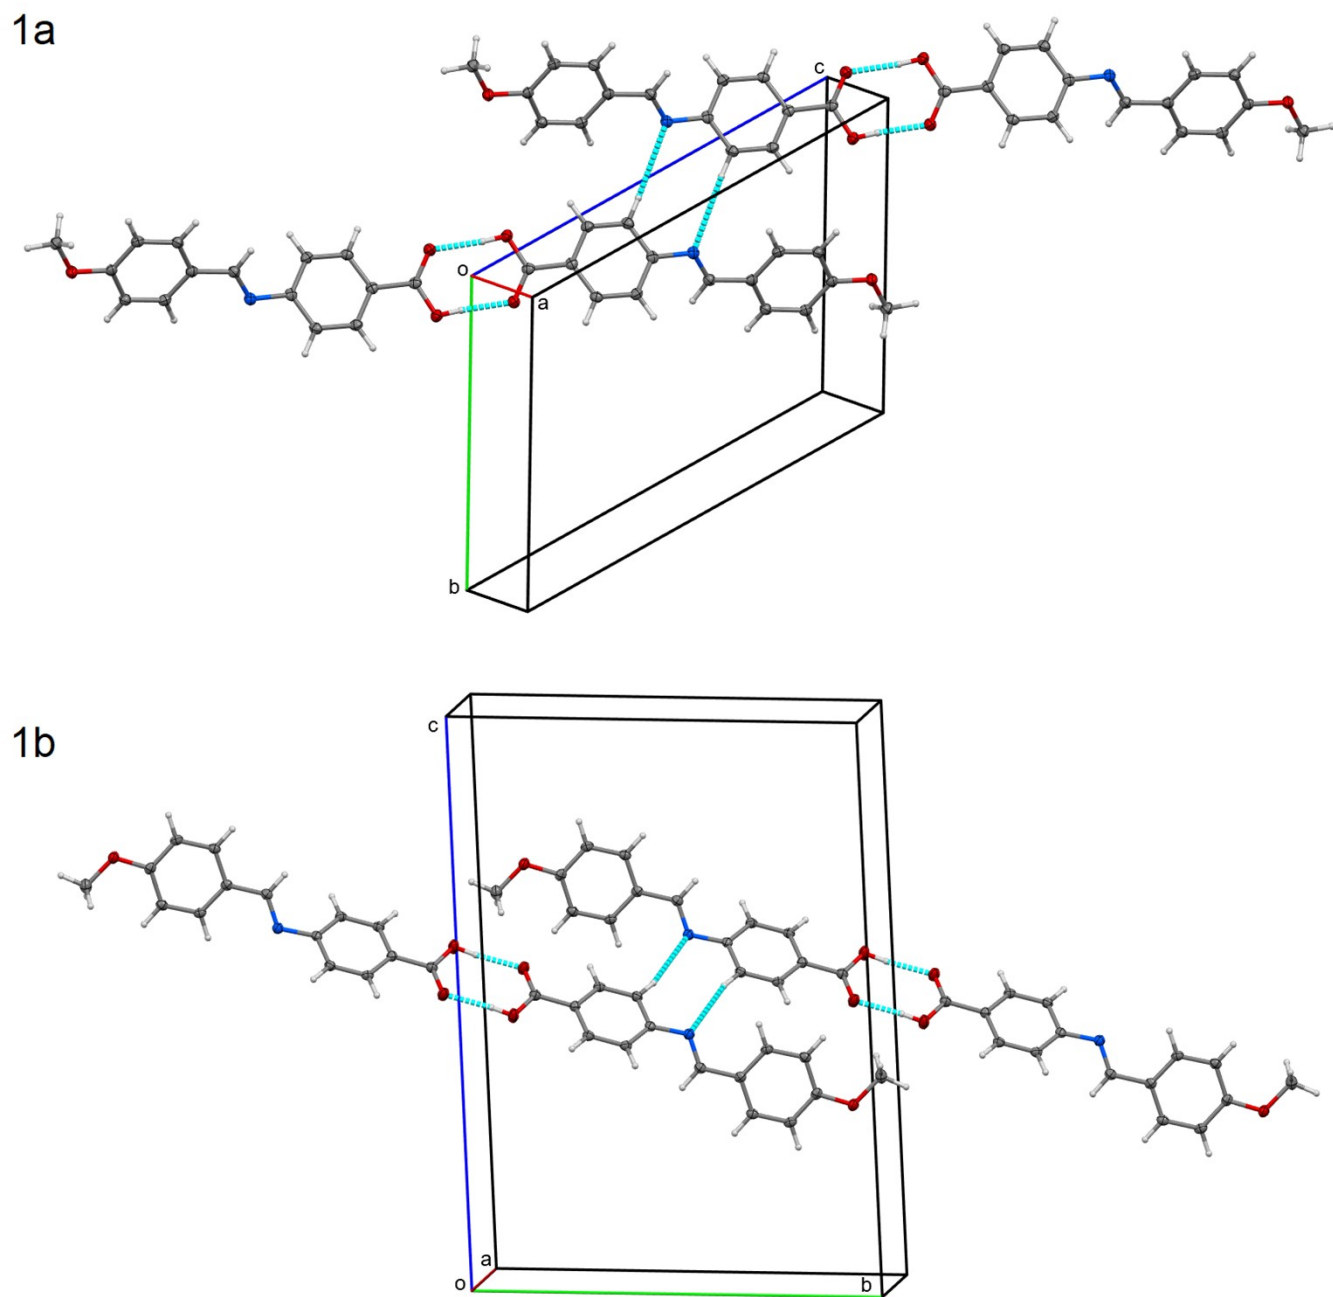

Figure S10. The hydrogen bond  $R_2^2(8)$  synthons in **1a** and **1b**.

1a

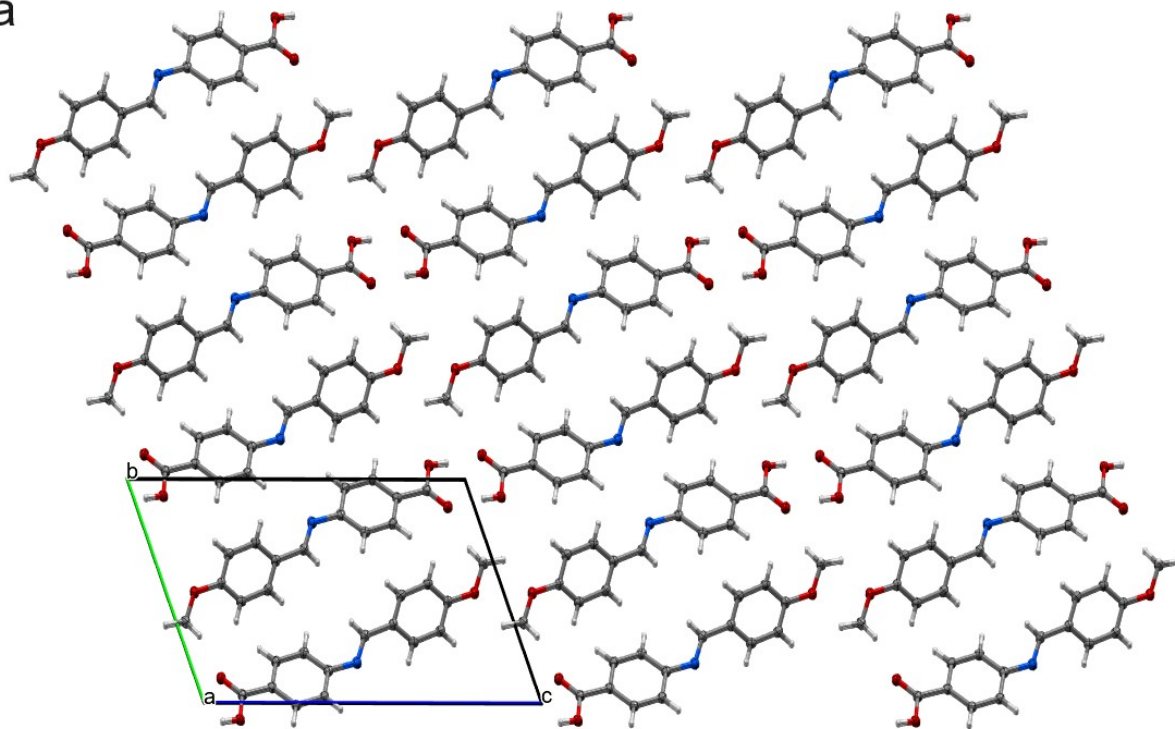

1b

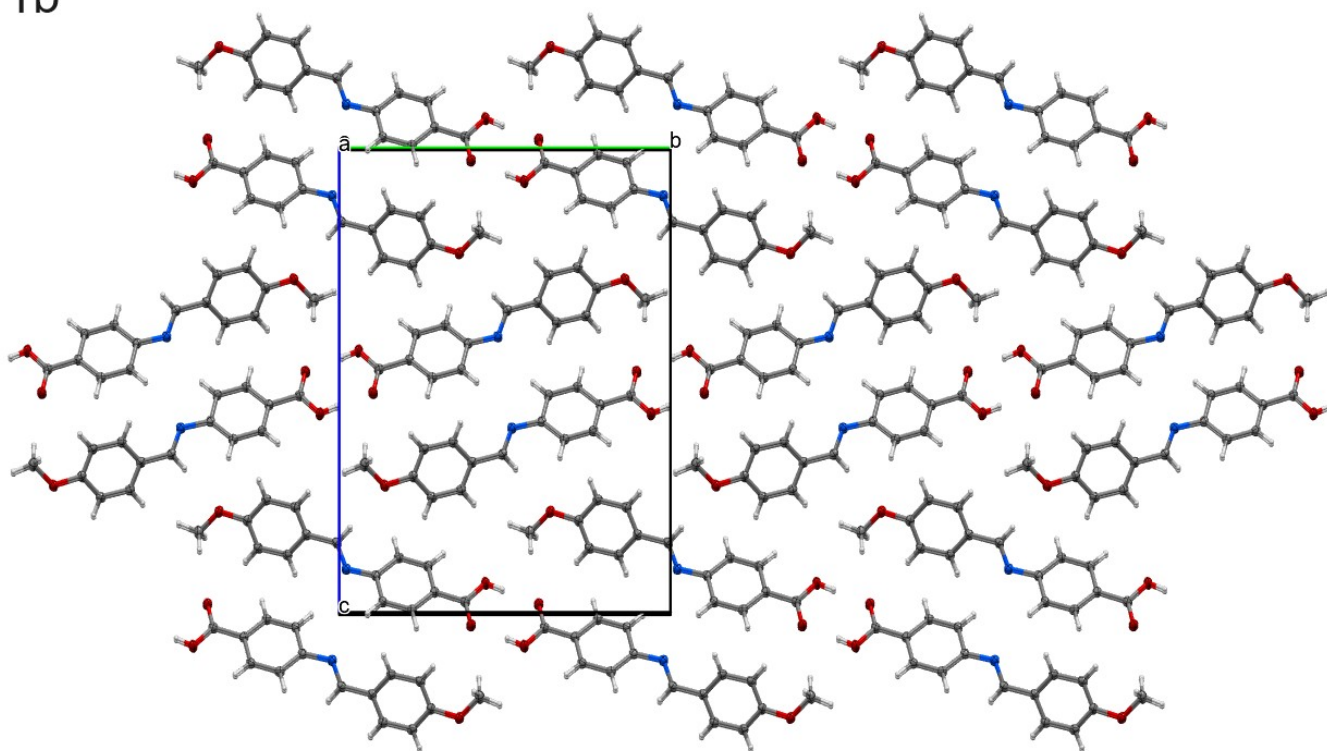

Figure S11. The molecular packing in **1a** and **1b** along (100) plane.

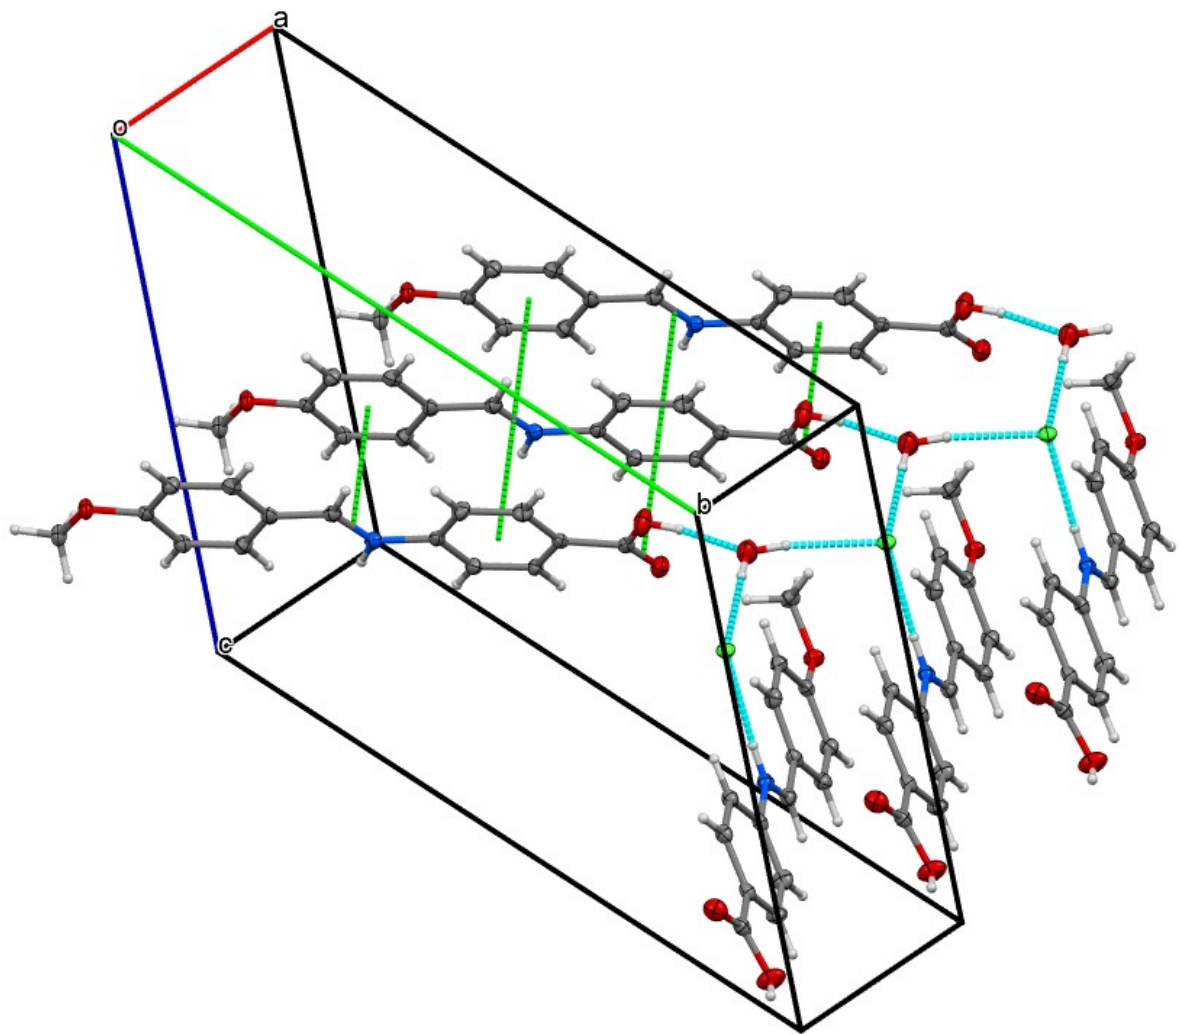

Figure S12. The hydrogen bond network (cyan) and  $\pi \cdots \pi$  interactions (green) in **2**.



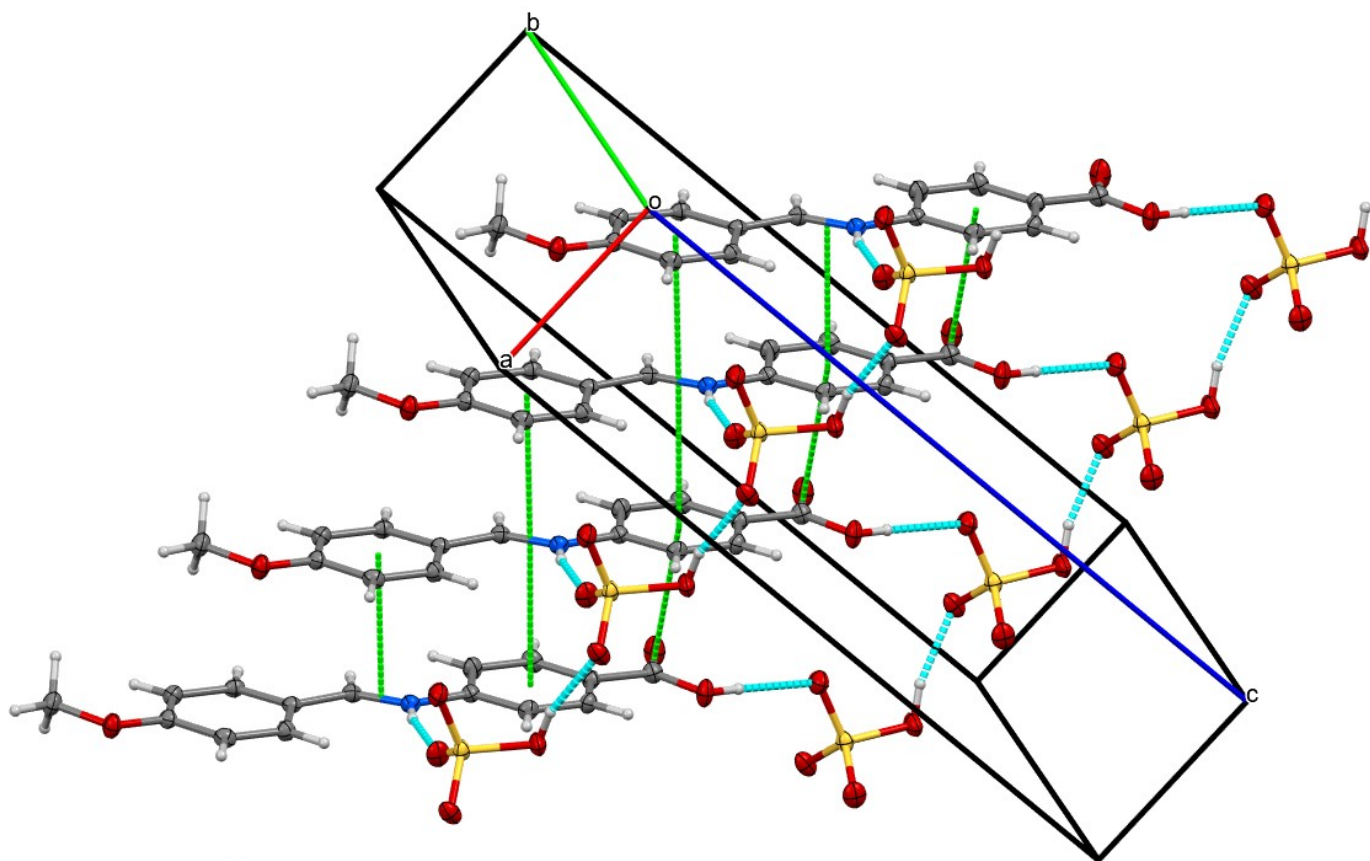

Figure S13. The hydrogen bond network (cyan) and  $\pi \cdots \pi$  interactions (green) in **5**.

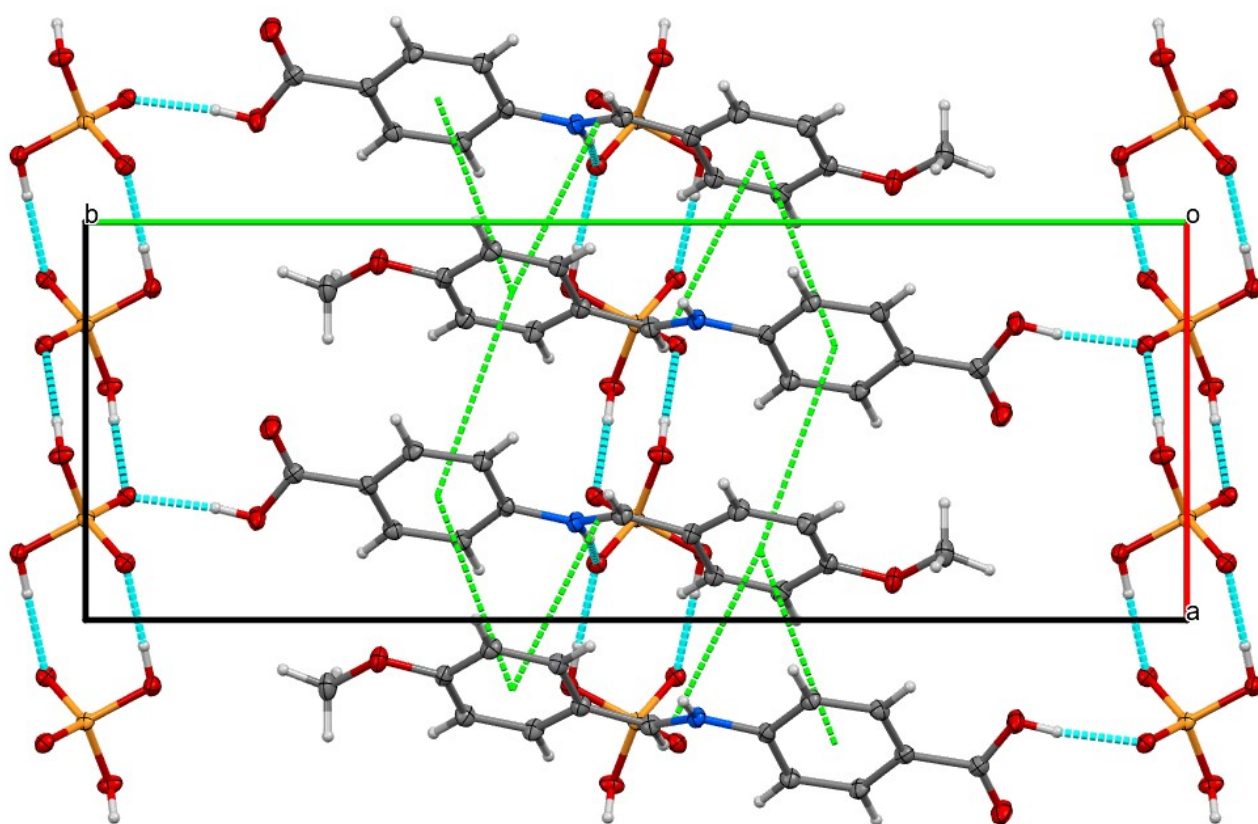

Figure S14. The hydrogen bond network (cyan) and  $\pi \cdots \pi$  interactions (green) in **6**.

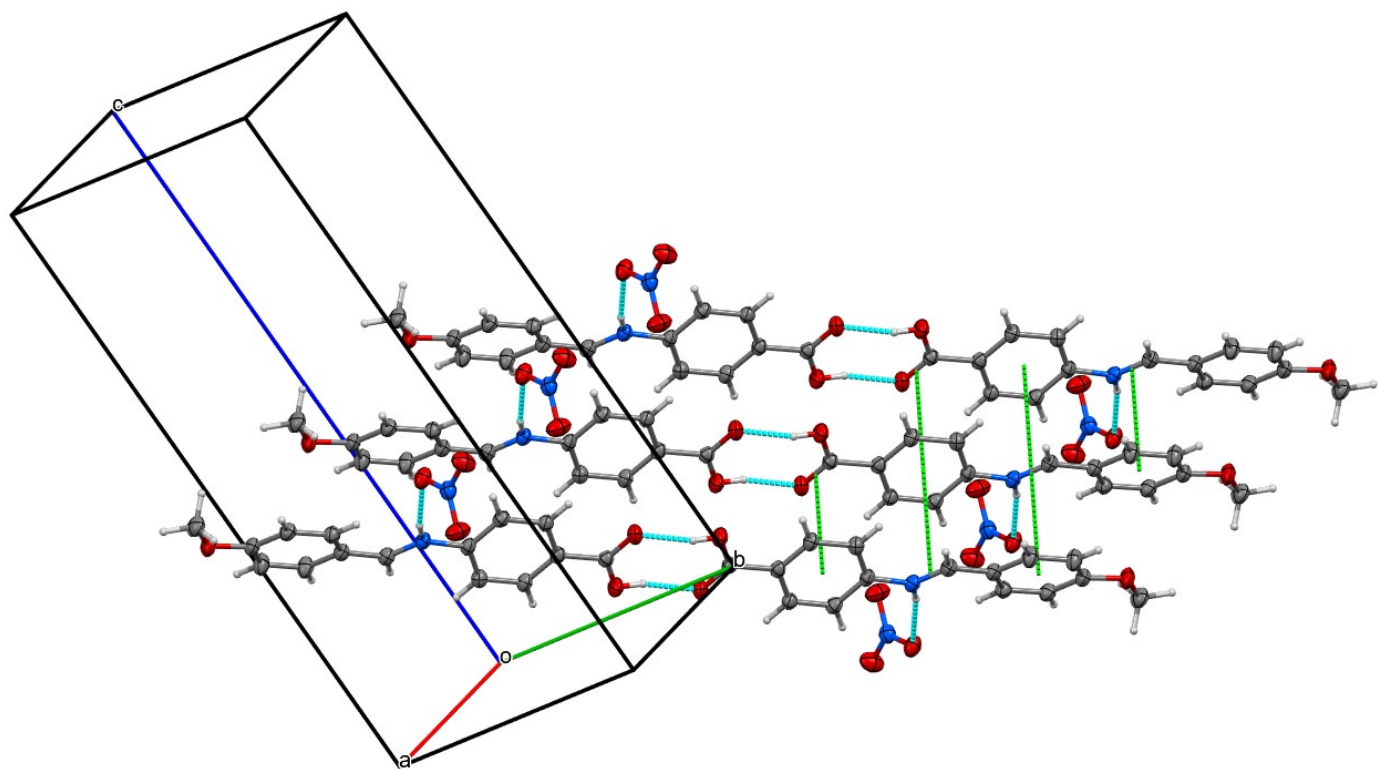

Figure S15. The hydrogen bond network (cyan) and  $\pi \cdots \pi$  interactions (green) in **4**.

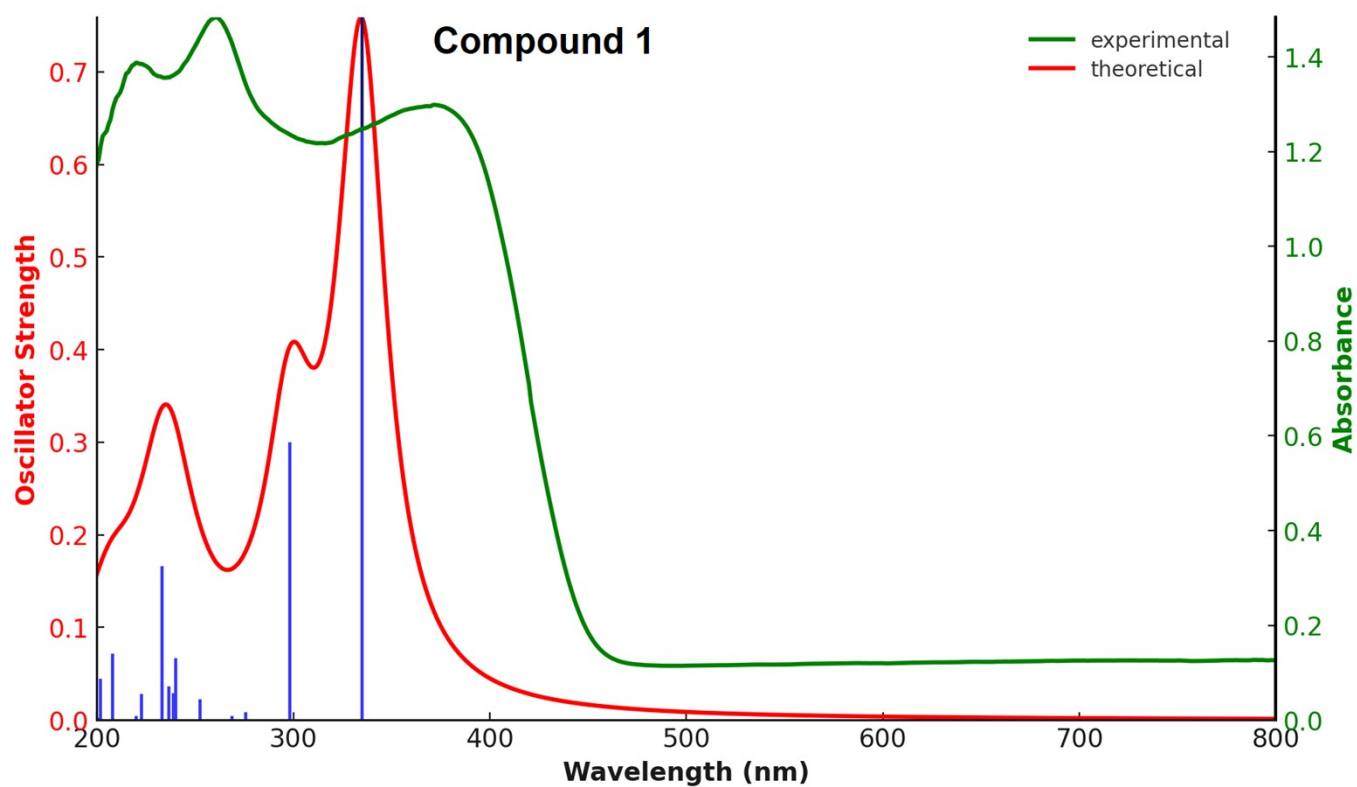

Figure S16. Experimental (green) and calculated (red) UV-Vis spectra of **1**. Oscillator strengths are represented as vertical navy-blue lines.

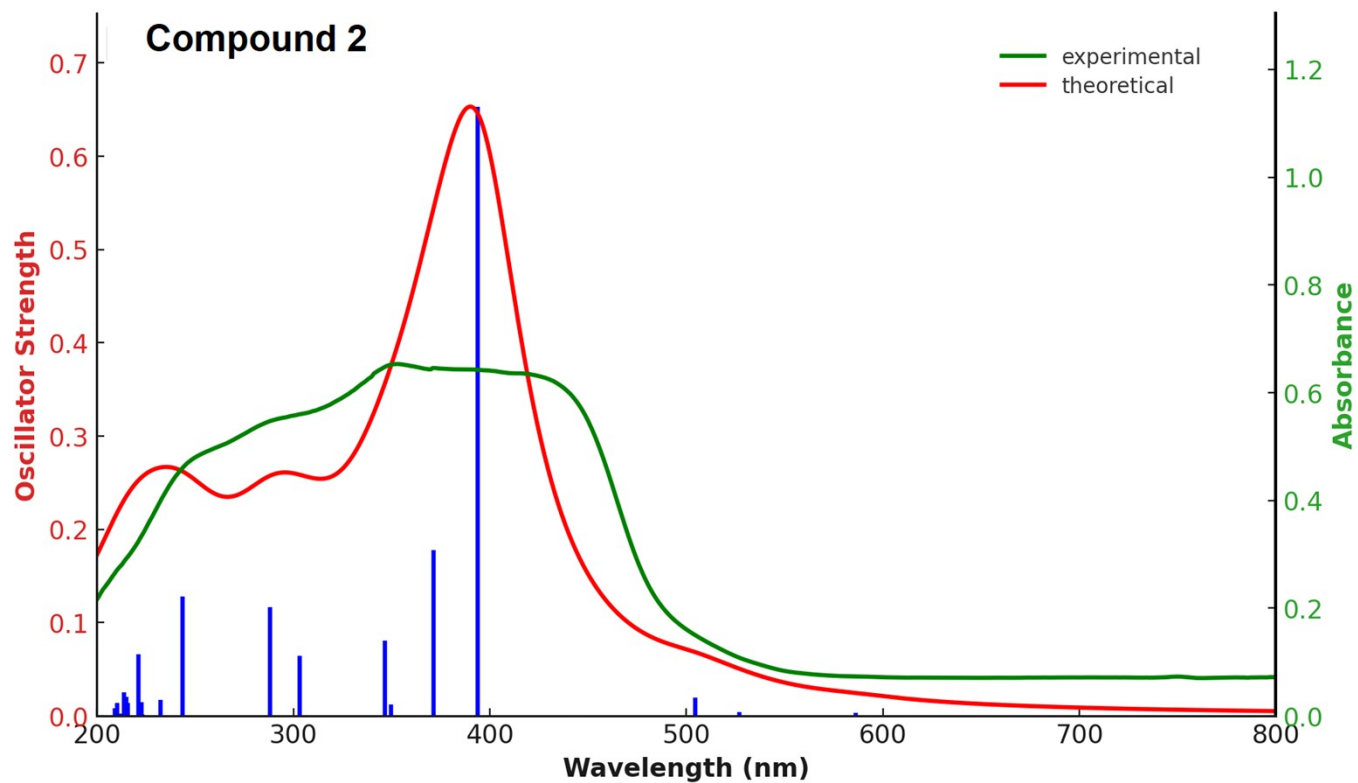

Figure S17. Experimental (green) and calculated (red) UV-Vis spectra of **2**. Oscillator strengths are represented as vertical navy-blue lines.

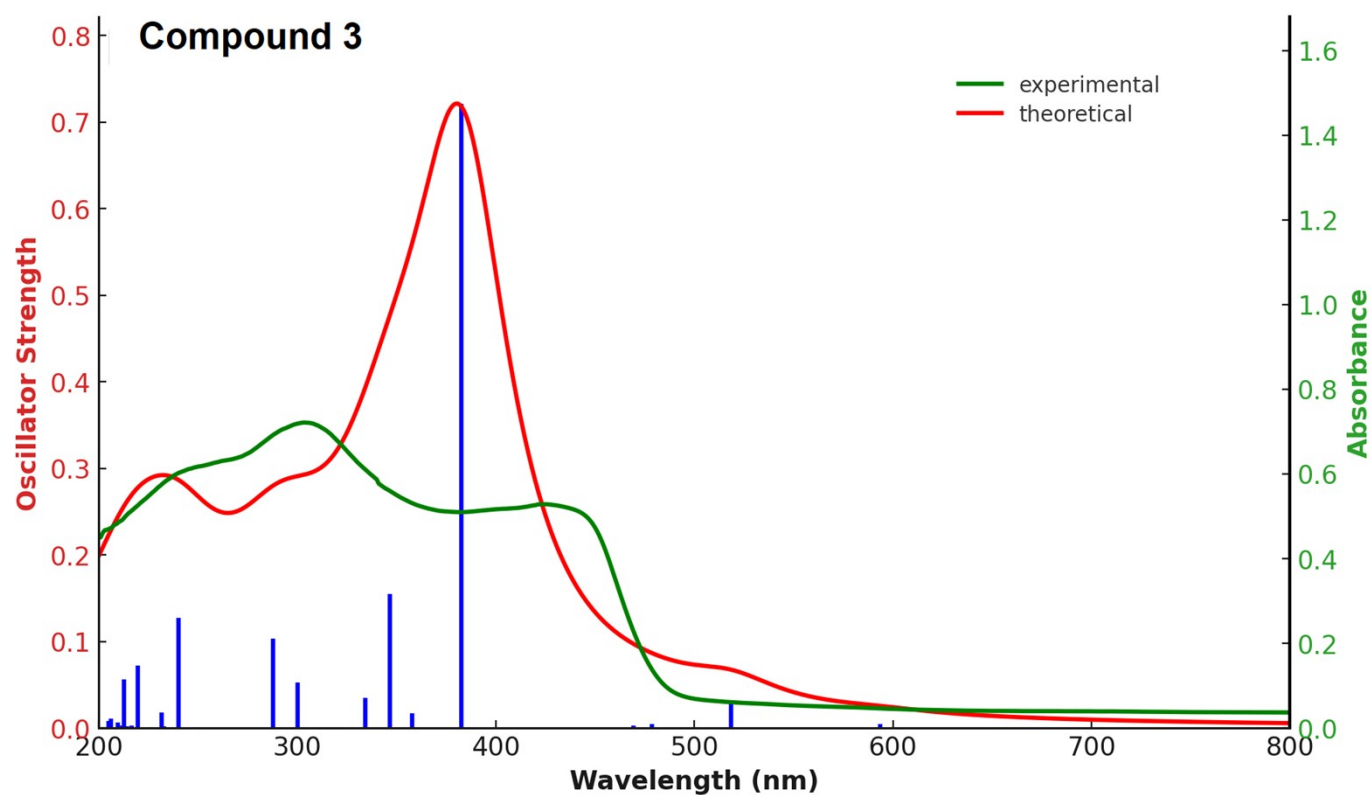

Figure S18. Experimental (green) and calculated (red) UV-Vis spectra of **3**. Oscillator strengths are represented as vertical navy-blue lines.

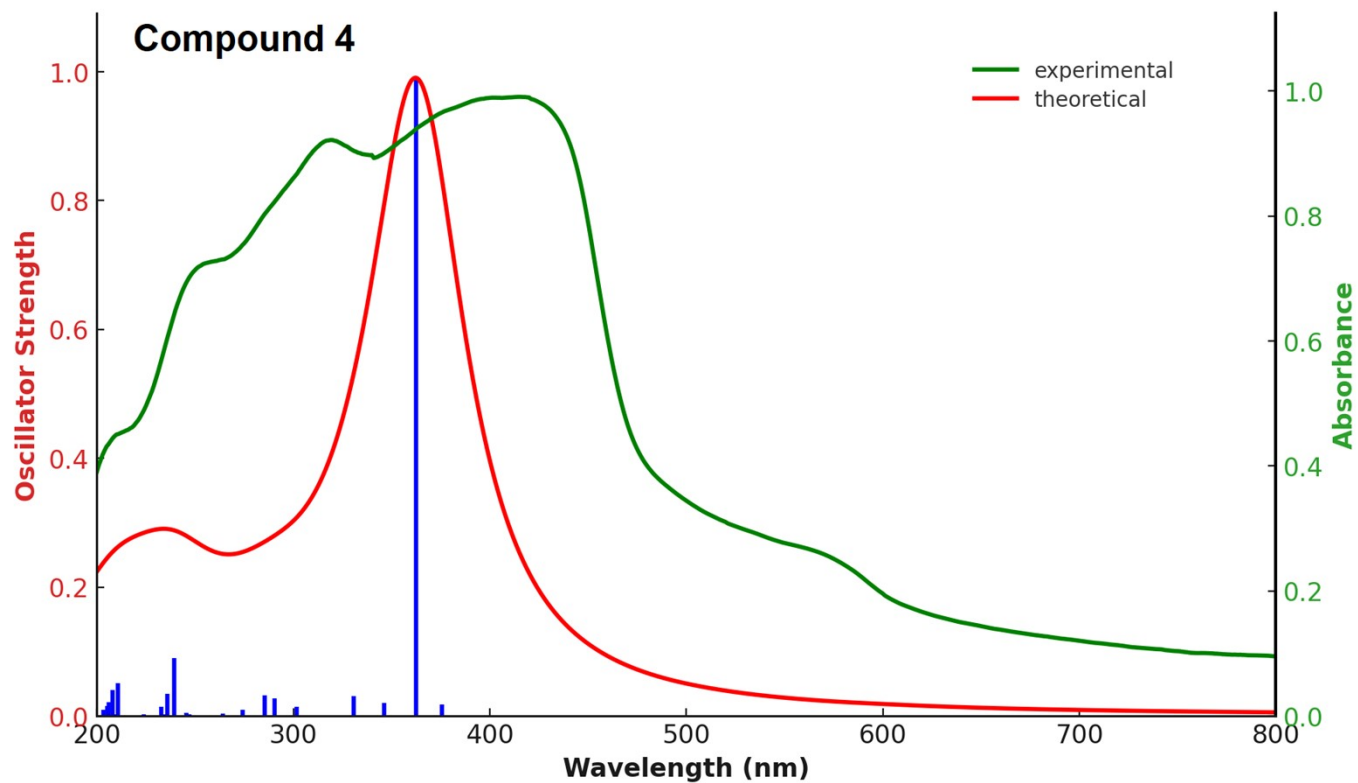

Figure S19. Experimental (green) and calculated (red) UV-Vis spectra of **4**. Oscillator strengths are represented as vertical navy-blue lines.

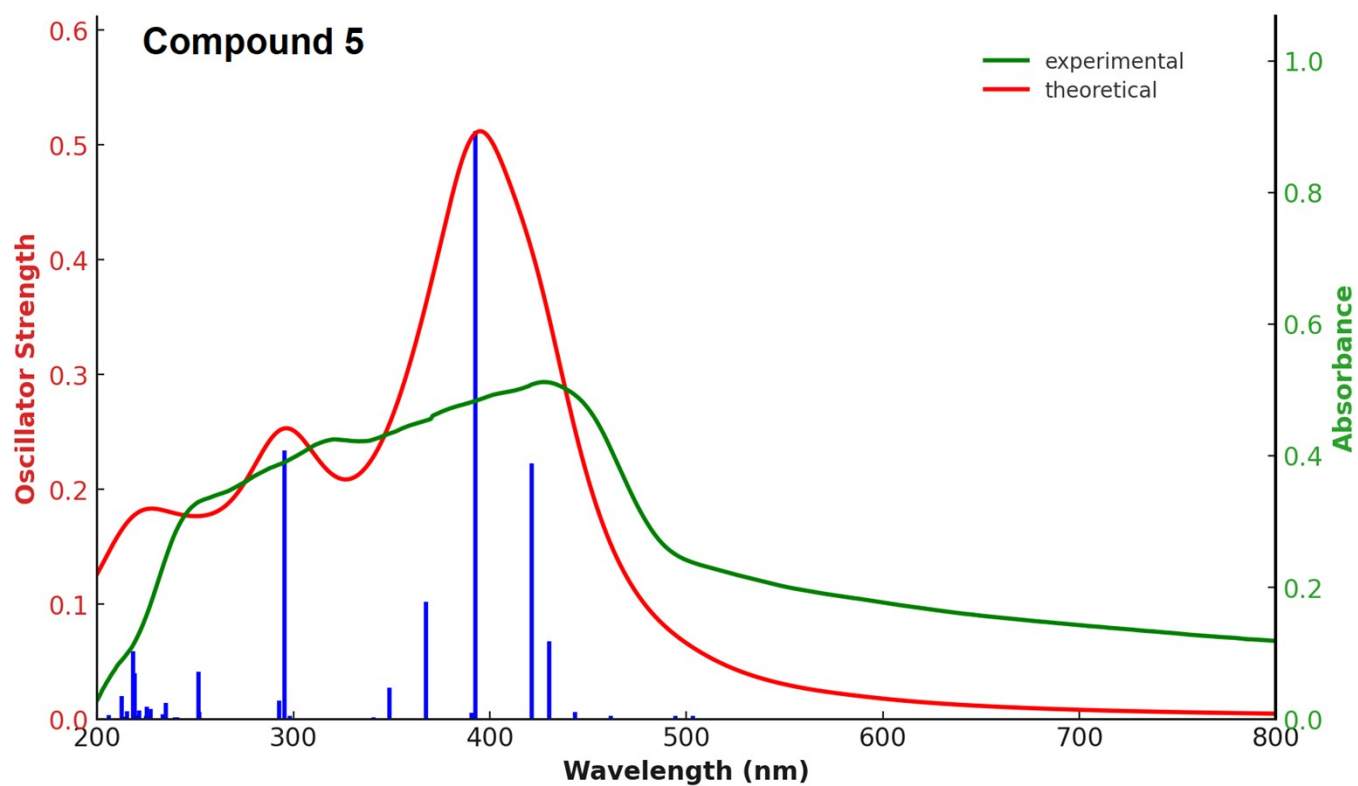

Figure S20. Experimental (green) and calculated (red) UV-Vis spectra of **5**. Oscillator strengths are represented as vertical navy-blue lines.

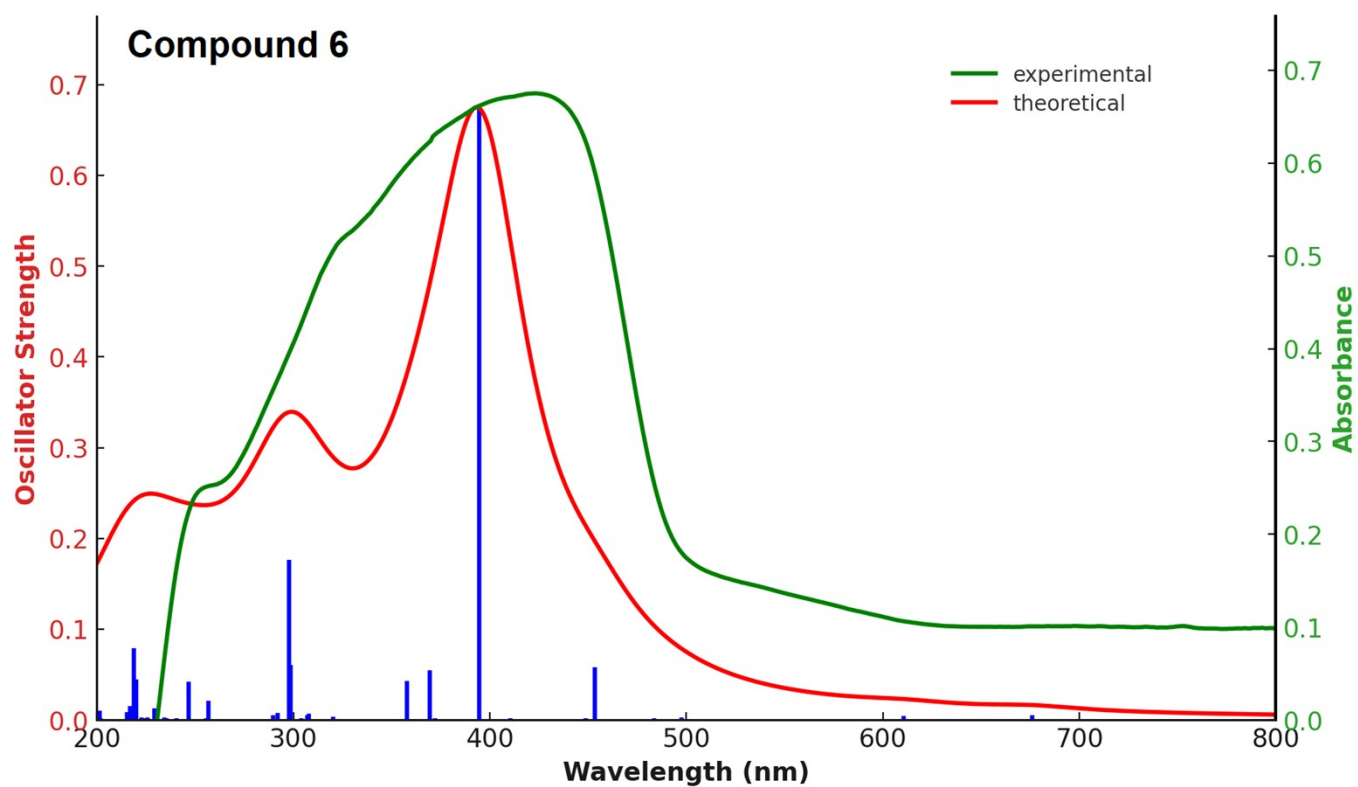

Figure S21. Experimental (green) and calculated (red) UV-Vis spectra of **6**. Oscillator strengths are represented as vertical navy-blue lines.

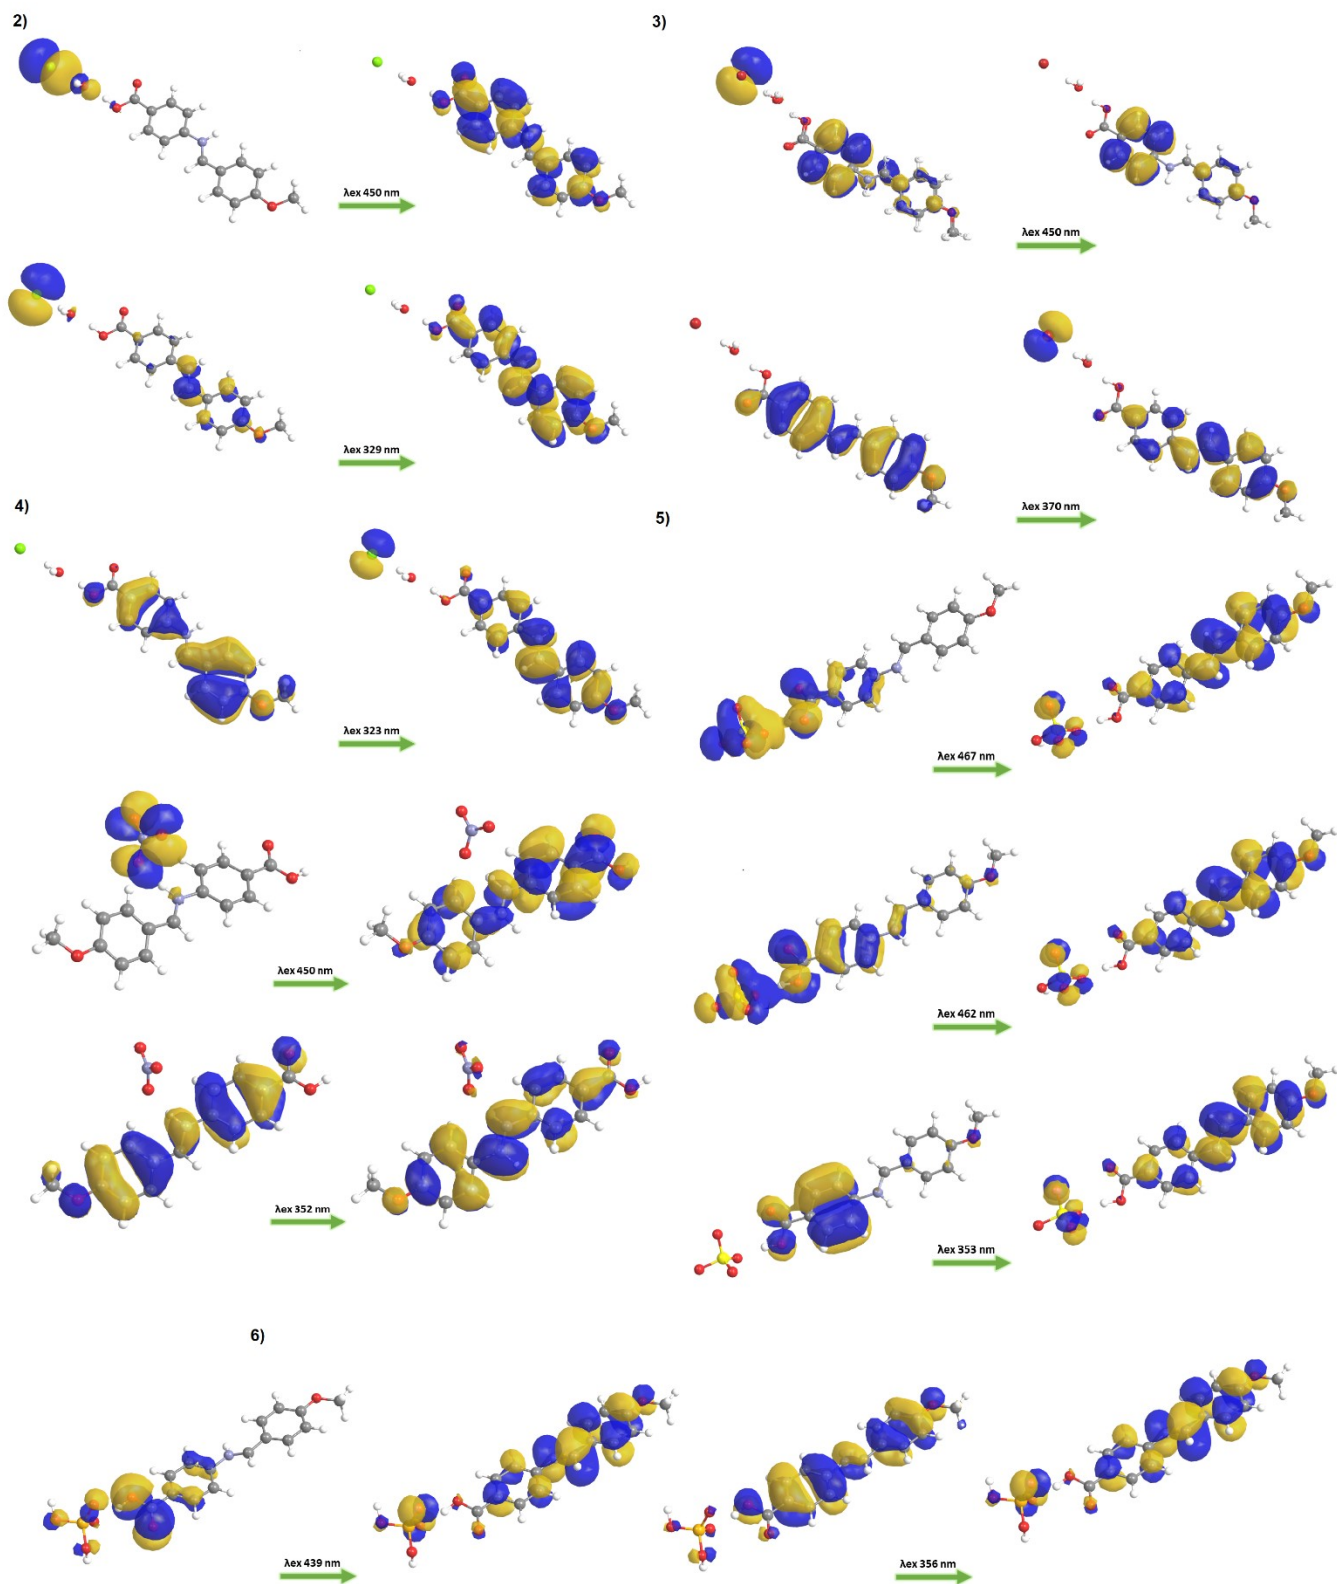

Figure S22. Calculated molecular orbital transition in the studied compounds (2-6), corresponding to the fluorescence emission maxima.

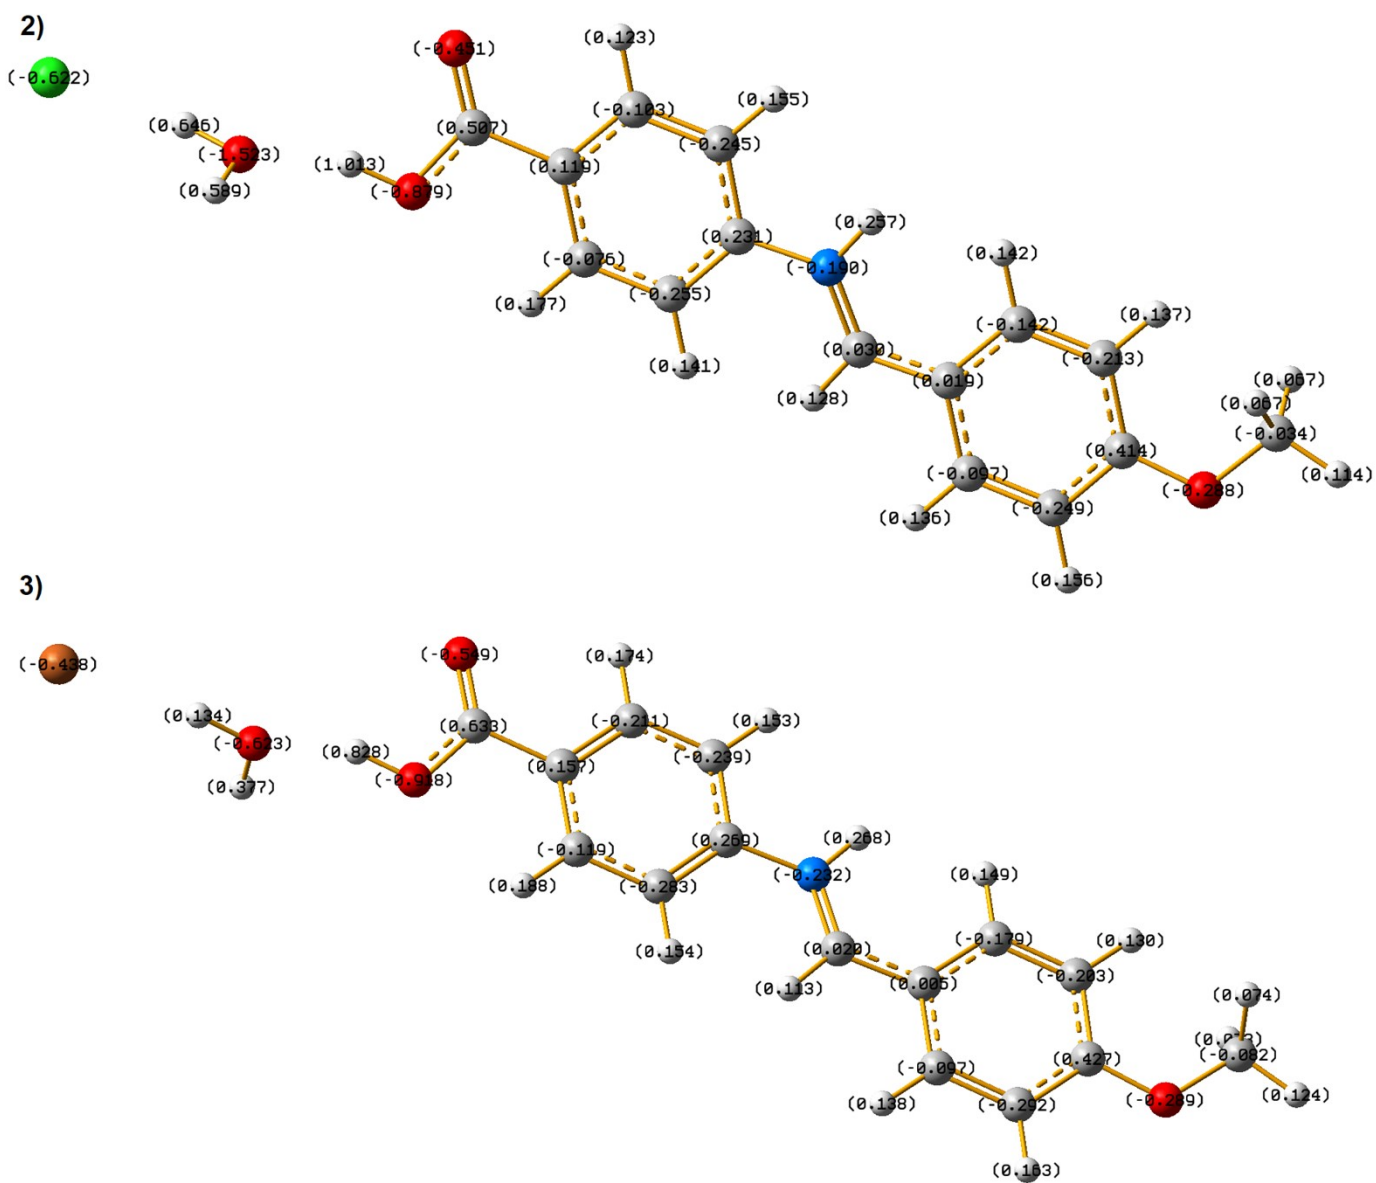

Figure S23. Calculated charge distribution in compounds **2** and **3**.

Table S1. Crystal data and structure refinement details for studied compounds.

| Compound (CCDC number)                                        | <b>1a</b> (2285252)                                  | <b>1b</b> (2285249)                                  | <b>2</b> (2285251)                                   | <b>3</b> (2285248)                                   | <b>4</b> (2285246)                                            | <b>5</b> (2285247)                                   | <b>6</b> (2285250)                                   |
|---------------------------------------------------------------|------------------------------------------------------|------------------------------------------------------|------------------------------------------------------|------------------------------------------------------|---------------------------------------------------------------|------------------------------------------------------|------------------------------------------------------|
| Empirical formula                                             | C <sub>15</sub> H <sub>13</sub> NO <sub>3</sub>      | C <sub>15</sub> H <sub>13</sub> NO <sub>3</sub>      | C <sub>15</sub> H <sub>16</sub> ClNO <sub>4</sub>    | C <sub>15</sub> H <sub>16</sub> BrNO <sub>4</sub>    | C <sub>15</sub> H <sub>14</sub> N <sub>2</sub> O <sub>6</sub> | C <sub>15</sub> H <sub>15</sub> NO <sub>7</sub> S    | C <sub>15</sub> H <sub>16</sub> NO <sub>7</sub> P    |
| Formula weight                                                | 255.26                                               | 255.26                                               | 309.74                                               | 354.20                                               | 318.28                                                        | 353.34                                               | 353.26                                               |
| Temperature (K)                                               | 100.00(10)                                           | 100.01(10)                                           | 100.00(13)                                           | 100.00(10)                                           | 99.9(8)                                                       | 100.0(1)                                             | 100.01(10)                                           |
| Crystal system                                                | triclinic                                            | monoclinic                                           | monoclinic                                           | monoclinic                                           | monoclinic                                                    | monoclinic                                           | monoclinic                                           |
| Space group                                                   | <i>P</i> -1                                          | <i>P</i> 2 <sub>1</sub> / <i>c</i>                   | <i>P</i> 2 <sub>1</sub> / <i>c</i>                   | <i>P</i> 2 <sub>1</sub> / <i>c</i>                   | <i>P</i> 2 <sub>1</sub> / <i>n</i>                            | <i>Pc</i>                                            | <i>P</i> 2 <sub>1</sub> / <i>c</i>                   |
| a (Å)                                                         | 3.89223(4)                                           | 3.82566(3)                                           | 4.70370(10)                                          | 4.72040(10)                                          | 4.83768(17)                                                   | 4.47140(10)                                          | 7.99120(10)                                          |
| b (Å)                                                         | 10.76523(10)                                         | 15.07160(6)                                          | 20.9656(3)                                           | 21.1550(5)                                           | 14.8178(5)                                                    | 9.3275(2)                                            | 21.7863(2)                                           |
| c (Å)                                                         | 15.40737(14)                                         | 21.19950(9)                                          | 14.8427(2)                                           | 15.1364(3)                                           | 20.0275(6)                                                    | 17.7797(5)                                           | 9.04030(10)                                          |
| α (°)                                                         | 109.0366(8)                                          | 90                                                   | 90                                                   | 90                                                   | 90                                                            | 90                                                   | 90                                                   |
| β (°)                                                         | 94.0110(8)                                           | 92.4431(5)                                           | 92.1960(10)                                          | 92.616(2)                                            | 95.964(3)                                                     | 90.109(2)                                            | 100.0910(10)                                         |
| γ (°)                                                         | 90.8565(8)                                           | 90                                                   | 90                                                   | 90                                                   | 90                                                            | 90                                                   | 90                                                   |
| Volume (Å <sup>3</sup> )                                      | 608.291(11)                                          | 1221.225(11)                                         | 1462.65(4)                                           | 1509.95(6)                                           | 1427.87(9)                                                    | 741.54(3)                                            | 1549.56(3)                                           |
| Z                                                             | 2                                                    | 4                                                    | 4                                                    | 4                                                    | 4                                                             | 2                                                    | 4                                                    |
| ρ <sub>calc</sub> (g/cm <sup>3</sup> )                        | 1.394                                                | 1.388                                                | 1.407                                                | 1.558                                                | 1.481                                                         | 1.582                                                | 1.514                                                |
| μ (mm <sup>-1</sup> )                                         | 0.803                                                | 0.800                                                | 2.458                                                | 3.854                                                | 0.988                                                         | 2.327                                                | 1.946                                                |
| <i>F</i> (000)                                                | 268.0                                                | 536.0                                                | 648.0                                                | 720.0                                                | 664.0                                                         | 368.0                                                | 736.0                                                |
| Crystal size (mm <sup>3</sup> )                               | 0.23 × 0.165 × 0.08                                  | 0.221 × 0.2 × 0.086                                  | 0.230 × 0.029 × 0.020                                | 0.367 × 0.054 × 0.034                                | 0.137 × 0.044 × 0.021                                         | 0.230 × 0.054 × 0.024                                | 0.29 × 0.176 × 0.044                                 |
| Radiation                                                     | Cu Kα (λ = 1.54184)                                           | Cu Kα (λ = 1.54184)                                  | Cu Kα (λ = 1.54184)                                  |
| θ range for data collect. (°)                                 | 8.696 to 157.488                                     | 7.198 to 157.82                                      | 7.3 to 156.822                                       | 8.36 to 157.764                                      | 7.436 to 158.888                                              | 9.482 to 159.22                                      | 8.116 to 157.81                                      |
| Index ranges                                                  | -4 ≤ h ≤ 4,<br>-13 ≤ k ≤ 13,<br>-19 ≤ l ≤ 19         | -4 ≤ h ≤ 4,<br>-19 ≤ k ≤ 19,<br>-26 ≤ l ≤ 26         | -5 ≤ h ≤ 4,<br>-25 ≤ k ≤ 26,<br>-18 ≤ l ≤ 18         | -5 ≤ h ≤ 5,<br>-26 ≤ k ≤ 26,<br>-19 ≤ l ≤ 18         | -5 ≤ h ≤ 5,<br>-18 ≤ k ≤ 18,<br>-25 ≤ l ≤ 25                  | -5 ≤ h ≤ 5,<br>-11 ≤ k ≤ 11,<br>-21 ≤ l ≤ 22         | -10 ≤ h ≤ 10,<br>-27 ≤ k ≤ 27,<br>-9 ≤ l ≤ 11        |
| Reflections collected / independent                           | 33767 / 2543                                         | 85187 / 2622                                         | 14626/2923                                           | 22483/3130                                           | 3740/3740                                                     | 24898/2993                                           | 37063/3198                                           |
| R <sub>int</sub>                                              | 0.0391                                               | 0.0490                                               | 0.0291                                               | 0.0516                                               | 0.0791                                                        | 0.0405                                               | 0.0367                                               |
| Data/restraints/parameters                                    | 2543/0/174                                           | 2622/0/174                                           | 2923/0/195                                           | 3130/0/195                                           | 3740/0/211                                                    | 2993/2/221                                           | 3198/0/221                                           |
| Goodness-of-fit on <i>F</i> <sup>2</sup>                      | 1.086                                                | 1.057                                                | 1.031                                                | 1.080                                                | 1.092                                                         | 1.073                                                | 1.063                                                |
| Final <i>R</i> indexes [ <i>I</i> > 2σ( <i>I</i> )]           | R <sub>1</sub> = 0.0337,<br>wR <sub>2</sub> = 0.0934 | R <sub>1</sub> = 0.0339,<br>wR <sub>2</sub> = 0.0887 | R <sub>1</sub> = 0.0391,<br>wR <sub>2</sub> = 0.1008 | R <sub>1</sub> = 0.0445,<br>wR <sub>2</sub> = 0.1056 | R <sub>1</sub> = 0.0568,<br>wR <sub>2</sub> = 0.1666          | R <sub>1</sub> = 0.0260,<br>wR <sub>2</sub> = 0.0708 | R <sub>1</sub> = 0.0284,<br>wR <sub>2</sub> = 0.0737 |
| R indexes (all data)                                          | R <sub>1</sub> = 0.0353,<br>wR <sub>2</sub> = 0.0944 | R <sub>1</sub> = 0.0346,<br>wR <sub>2</sub> = 0.0893 | R <sub>1</sub> = 0.0459,<br>wR <sub>2</sub> = 0.1046 | R <sub>1</sub> = 0.0496,<br>wR <sub>2</sub> = 0.1084 | R <sub>1</sub> = 0.0649,<br>wR <sub>2</sub> = 0.1731          | R <sub>1</sub> = 0.0265,<br>wR <sub>2</sub> = 0.0711 | R <sub>1</sub> = 0.0293,<br>wR <sub>2</sub> = 0.0744 |
| Largest diff. peak and hole (e <sup>-</sup> Å <sup>-3</sup> ) | 0.24/-0.23                                           | 0.25/-0.20                                           | 0.80/-0.28                                           | 1.26/-0.61                                           | 0.39/-0.31                                                    | 0.23/-0.20                                           | 0.21/-0.49                                           |



Table S2. Bond lengths (Å) for the studied compounds.

| Compound | 1a         | 1b         | 2        | 3        | 4        | 5        | 6          |
|----------|------------|------------|----------|----------|----------|----------|------------|
| O3—C12   | 1.3559(12) | 1.3692(12) | 1.351(2) | 1.356(4) | 1.343(3) | 1.351(6) | 1.3511(14) |
| O3—C15   | 1.4354(12) | 1.4314(13) | 1.433(2) | 1.423(4) | 1.435(4) | 1.439(6) | 1.4386(15) |
| O1—C1    | 1.2352(12) | 1.3105(12) | 1.334(2) | 1.333(4) | 1.279(3) | 1.212(6) | 1.2096(15) |
| O2—C1    | 1.3144(12) | 1.2396(12) | 1.196(2) | 1.188(4) | 1.260(3) | 1.324(6) | 1.3244(15) |
| N1—C5    | 1.4085(13) | 1.4076(13) | 1.439(2) | 1.449(4) | 1.426(3) | 1.431(6) | 1.4251(15) |
| N1—C8    | 1.2798(13) | 1.2773(14) | 1.299(2) | 1.291(4) | 1.301(3) | 1.306(6) | 1.2984(16) |
| C9—C8    | 1.4580(14) | 1.4656(14) | 1.430(3) | 1.436(5) | 1.432(4) | 1.425(7) | 1.4325(17) |
| C2—C1    | 1.4784(13) | 1.4751(14) | 1.487(2) | 1.489(4) | 1.487(3) | 1.494(7) | 1.4950(16) |

Table S3. Bond angles (°) for the studied compounds.

| Compound   | 1a        | 1b        | 2          | 3        | 4        | 5        | 6          |
|------------|-----------|-----------|------------|----------|----------|----------|------------|
| C12—O3—C15 | 117.46(8) | 117.12(8) | 117.50(13) | 117.7(2) | 118.9(2) | 117.9(4) | 117.88(10) |
| C8—N1—C5   | 117.94(8) | 119.80(9) | 125.33(16) | 125.0(3) | 125.9(2) | 124.5(4) | 125.87(10) |
| C14—C9—C8  | 121.94(9) | 120.70(9) | 123.93(17) | 124.2(3) | 124.0(2) | 124.5(4) | 122.84(11) |
| C10—C9—C8  | 119.42(9) | 120.78(9) | 117.12(16) | 116.7(3) | 117.6(2) | 116.8(4) | 118.42(11) |
| O3—C12—C13 | 115.44(9) | 124.14(9) | 123.68(16) | 123.5(3) | 124.5(2) | 114.7(4) | 114.73(10) |
| O3—C12—C11 | 124.48(9) | 115.56(9) | 115.53(15) | 115.8(3) | 115.5(2) | 125.0(4) | 124.80(11) |
| O1—C1—O2   | 122.93(9) | 122.83(9) | 124.07(17) | 125.1(3) | 124.2(2) | 123.7(5) | 124.05(11) |
| C3—C2—C1   | 118.71(9) | 121.74(9) | 121.90(17) | 121.9(3) | 121.2(2) | 117.5(4) | 119.05(10) |
| C7—C2—C1   | 121.78(9) | 118.60(9) | 118.83(16) | 119.1(3) | 118.4(2) | 122.9(4) | 121.37(11) |
| C6—C5—N1   | 118.85(9) | 117.98(9) | 116.25(16) | 116.5(3) | 116.5(2) | 117.0(4) | 116.37(10) |
| C4—C5—N1   | 121.70(9) | 122.12(9) | 122.80(16) | 122.5(3) | 122.1(2) | 121.9(4) | 122.45(11) |
| N1—C8—C9   | 123.51(9) | 121.23(9) | 125.47(17) | 125.5(3) | 124.7(2) | 125.4(4) | 124.39(11) |
| O1—C1—C2   | 121.82(9) | 115.59(9) | 112.08(15) | 111.6(3) | 117.0(2) | 122.6(4) | 123.20(11) |
| O2—C1—C2   | 115.23(8) | 121.57(9) | 123.85(17) | 123.3(3) | 118.8(2) | 113.6(4) | 112.75(10) |

Table S4. Interplane angles (°) between phenylene ring mean planes in the studied compounds.

|    |      |
|----|------|
| 1a | 52.4 |
| 1b | 49.2 |
| 2  | 1.8  |
| 3  | 0.9  |
| 4  | 23.2 |
| 5  | 1.0  |
| 6  | 7.2  |

Table S5. Stacking interactions in the studied compounds. Each ring, R, is indicated by one membered atom. Each bond, B, is indicated by both membered atoms. The d is a distance between centroid of I, Cg(I), and centroid of J, Cg(J),  $\alpha$  is a dihedral angle between planes of rings I and J,  $\beta$  is an angle between Cg(I)-Cg(J) vector and normal to plane I,  $d_p$  is a perpendicular distance of Cg(J) on the ring I plane.

| I...J                             | d (Å)    | $\alpha$ (°) | $\beta$ (°) | $d_p$ (Å) |
|-----------------------------------|----------|--------------|-------------|-----------|
| <b>1a</b>                         |          |              |             |           |
| R(C2)•••R(C2) <sup>(i)</sup>      | 3.892(2) | 0            | 29.5        | 3.3865(6) |
| R(C9)•••R(C9) <sup>(i)</sup>      | 3.892(2) | 0            | 30.2        | 3.3640(6) |
| <b>1b</b>                         |          |              |             |           |
| R(C2)•••R(C2) <sup>(i)</sup>      | 3.826(2) | 0            | 27.9        | 3.3799(7) |
| R(C9)•••R(C9) <sup>(i)</sup>      | 3.826(2) | 0            | 27.3        | 3.3995(7) |
| <b>2</b>                          |          |              |             |           |
| R(C2)•••B(N1C8) <sup>(iii)</sup>  | 3.345(2) | -            | -           | -         |
| R(C2)•••B(C1-O2) <sup>(i)</sup>   | 3.373(2) | -            | -           | -         |
| R(C9)•••B(N1-C8) <sup>(iii)</sup> | 3.340(2) | -            | -           | -         |
| <b>3</b>                          |          |              |             |           |
| R(C2)•••B(N1-C8) <sup>(iii)</sup> | 3.347(2) | -            | -           | -         |
| R(C2)•••B(C1-O2) <sup>(iii)</sup> | 3.371(2) | -            | -           | -         |
| R(C9)•••B(N1-C8) <sup>(iii)</sup> | 3.374(2) | -            | -           | -         |
| <b>4</b>                          |          |              |             |           |
| R(C2)•••B(N1-C8) <sup>(i)</sup>   | 3.554(2) | -            | -           | -         |
| R(C2)•••B(C1-O2) <sup>(ii)</sup>  | 3.441(2) | -            | -           | -         |
| R(C9)•••B(N1-C8) <sup>(iii)</sup> | 3.430(2) | -            | -           | -         |
| <b>5</b>                          |          |              |             |           |
| R(C2)•••B(N1-C8) <sup>(i)</sup>   | 3.384(2) | -            | -           | -         |
| R(C2)•••B(C1-O1) <sup>(iii)</sup> | 3.760(2) | -            | -           | -         |
| R(C9)•••B(N1-C8) <sup>(iii)</sup> | 3.330(2) | -            | -           | -         |
| <b>6</b>                          |          |              |             |           |
| R(C9)•••B(N1-C8) <sup>(iv)</sup>  | 3.880(2) | -            | -           | -         |
| R(C9)•••R(C2) <sup>(iv)</sup>     | 4.232(2) | 7.2(6)       | 34.1        | 3.4320(5) |
| R(C9)•••R(C2) <sup>(ii)</sup>     | 4.310(2) | 7.2(6)       | 31.0        | 3.3880(5) |

Symmetry transformations used to generate equivalent atoms: (i)  $x-1, y, z$ ; (ii)  $x, y, z$ ; (iii)  $x+1, y, z$ ; (iv)  $-x, -y+1, -z+1$ ;

Table S6. Hydrogen bonds in studied compounds [ $G_d^a(n)$  – unitary graph set].

| D-H...A                         | d(D—H) (Å) | d(H...A) (Å) | d(D...A) (Å) | <(DHA) (°) | $G_d^a(n)$ |
|---------------------------------|------------|--------------|--------------|------------|------------|
| <b>1a</b>                       |            |              |              |            |            |
| O2—H2...O1 <sup>(i)</sup>       | 0.84       | 1.80         | 2.6374(15)   | 176        | $R_2^2(8)$ |
| C6—H6...N1 <sup>(ii)</sup>      | 0.95       | 2.87         | 3.814(2)     | 176        | $R_2^2(8)$ |
| <b>1b</b>                       |            |              |              |            |            |
| O1—H1...O2 <sup>(iii)</sup>     | 0.84       | 1.78         | 2.6146(16)   | 175        | $R_2^2(8)$ |
| C6—H6...N1 <sup>(iv)</sup>      | 0.95       | 2.78         | 3.716(2)     | 168        | $R_2^2(8)$ |
| <b>2</b>                        |            |              |              |            |            |
| N1—H1A...Cl1 <sup>(v)</sup>     | 0.88       | 2.37         | 3.2247(15)   | 165        | D(2)       |
| O1—H1...O4                      | 0.84       | 1.79         | 2.597(2)     | 160        | D(2)       |
| O4—H4A... Cl1                   | 0.87       | 2.28         | 3.1352(15)   | 167        | D(2)       |
| O4—H4B... Cl1 <sup>(vi)</sup>   | 0.87       | 2.31         | 3.1706(15)   | 172        | D(2)       |
| <b>3</b>                        |            |              |              |            |            |
| N1—H1A...Br1 <sup>(vii)</sup>   | 0.88       | 2.50         | 3.360(3)     | 164        | D(2)       |
| O1—H1...O4                      | 0.84       | 1.79         | 2.584(4)     | 158        | D(2)       |
| O4—H4A... Br1                   | 1.00       | 2.29         | 3.262(3)     | 164        | D(2)       |
| O4—H4B... Br1 <sup>(viii)</sup> | 1.07       | 2.25         | 3.305(3)     | 168        | D(2)       |
| <b>4</b>                        |            |              |              |            |            |
| N1—H1A...O4                     | 0.88       | 1.97         | 2.828(3)     | 163        | D(2)       |
| O1—H1...O2 <sup>(ix)</sup>      | 0.84       | 1.78         | 2.605(3)     | 167        | $R_2^2(8)$ |
| <b>5</b>                        |            |              |              |            |            |
| N1—H1...O5 <sup>(x)</sup>       | 0.88       | 1.95         | 2.810(3)     | 167        | D(2)       |
| O2—H2...O4                      | 0.84       | 1.86         | 2.692(3)     | 172        | D(2)       |
| O7—H7A... O6 <sup>(vi)</sup>    | 0.84       | 1.77         | 2.584(3)     | 164        | C(4)       |
| <b>6</b>                        |            |              |              |            |            |
| N1—H1...O4 <sup>(xi)</sup>      | 0.88       | 1.82         | 2.6845(13)   | 166        | D(2)       |
| O2—H2...O5                      | 0.84       | 1.78         | 2.6079(12)   | 169        | D(2)       |
| O6—H6A... O4 <sup>(xii)</sup>   | 0.84       | 1.76         | 2.5987(12)   | 179        | $R_2^2(8)$ |
| O7—H7A... O5 <sup>(xiii)</sup>  | 0.84       | 1.71         | 2.5324(11)   | 167        | $R_2^2(8)$ |

Symmetry transformations used to generate equivalent atoms: (i)  $-x, -y, -z$ ; (ii)  $-x+1, -y+1, -z+1$ ; (iii)  $-x+2, -y-2, -z+1$ ; (iv)  $-x+2, -y+1, -z+1$ ; (v)  $-x+2, y-1/2, -z+3/2$ ; (vi)  $x-1, y, z$ ; (vii)  $-x, y+1/2, -z+1/2$ ; (viii)  $x+1, y, z$ ; (ix)  $-x-1, -y+1, -z$ ; (x)  $x+1, -y+1, z-1/2$ ; (xi)  $x, -y+1/2, z-1/2$ ; (xii)  $-x, -y, -z+1$ ; (xiii)  $-x+1, -y, -z+1$ .
